# Supplementary material for: Balloon-Expandable versus Self-Expandable Valves in Transcatheter Aortic Valve Implantation: Complications and Outcomes from a Large International Patient Cohort
Source: MDPI journal article supplement (doi:10.3390/jcm10174005), 2021-09-04
Supplement: s1 [file s1]

## **Supplementary material**

Supplementary table S1

Supplementary table S2

Supplementary table S3

**Supplementary Table S1. Overview of original studies, number of patients, proportion of balloon- and self-expandable valves, procedure of valve selection and aortic valve calcification as measured by computed tomography.**

| Study name and PMID                        | CENTER* (n=) | BE vs SE* (%)                    | Valve selection                 | Calcification on CT                                                                |
|--------------------------------------------|--------------|----------------------------------|---------------------------------|------------------------------------------------------------------------------------|
| <b>Brazilian TAVI registry</b><br>27496637 | 768          | BE: 195 (25%)<br>SE: 573 (75%)   | Heart team in different centers | Not available                                                                      |
| <b>FRANCE-2</b><br>25240554                | 2347         | BE: 1506 (64%)<br>SE: 841 (36%)  | Heart team in different centers | 8% porcelain aorta                                                                 |
| <b>Milano</b><br>27184169                  | 515          | BE: 270 (52%)<br>SE: 245 (48%)   | Multidisciplinary heart team    | AV calcification: 52.6% grade 1-2, 46.6% grade 3-4. Mean annulus diameter 23.0 mm. |
| <b>Verona</b><br>27621826                  | 346          | BE: 254 (73%)<br>SE: 92 (27%)    | Institutional Heart Team        | Not available                                                                      |
| <b>Rabin</b><br>27726854                   | 544          | BE: 120 (22%)<br>SE: 424 (78%)   | Institutional Heart Team        | Not available                                                                      |
| <b>Padova</b><br>26603025                  | 447          | BE: 352 (79%)<br>SE: 95 (21%)    | Institutional Heart Team        | 16.3% porcelain aorta                                                              |
| <b>Spanish TAVI registry</b><br>24774108   | 5320         | BE: 2451 (46%)<br>SE: 2869 (54%) | Heart team in different centers | Mean annulus diameter 23.2 mm                                                      |
| <b>BRAVO-3</b><br>26477635                 | 732          | BE: 500 (68%)<br>SE: 232 (32%)   | Institutional Heart Team        | Not available                                                                      |
| <b>WIN-TAVI</b><br>27491609                | 785          | BE: 366 (47%)<br>SE: 419 (53%)   | Institutional Heart Team        | AV calcification: 17.7% grade 1-2, 82.3% grade 3-4. Mean annulus diameter 21.6 mm. |
| <b>OBSERVANT</b><br>26271063               | 577          | BE: 225 (39%)<br>SE: 352 (61%)   | Heart team in different centers | Patients with porcelain aorta were excluded. Mean annulus diameter 22.2 mm.        |

\* number of patients from the original study included in the CENTER database. CT = computed tomography.

**Supplementary table S2. Baseline characteristics of the overall patient population and the propensity matched cohort**

|                                      | Overall patient population |                |       | Propensity matched population |                |       |
|--------------------------------------|----------------------------|----------------|-------|-------------------------------|----------------|-------|
|                                      | BE(n=6239)                 | SE(n=6142)     | SMD   | BE(n=4096)                    | SE(n=4096)     | SMD   |
| <b>Demographics</b>                  |                            |                |       |                               |                |       |
| Age (years)                          | 81.7±6.9                   | 81.2±7.1       | 0.071 | 81.5±7.1                      | 81.3±7.1       | 0.028 |
| Female gender                        | 3700(59)                   | 3420(56)       | 0.081 | 2364(58)                      | 2336(57)       | 0.015 |
| Body mass index (kg/m <sup>2</sup> ) | 27.0±4.8                   | 27.3±4.9       | 0.062 | 27.2±4.8                      | 27.1±4.8       | 0.021 |
| <b>Medical history</b>               |                            |                |       |                               |                |       |
| Previous CVA or TIA                  | 660(11)                    | 631(10)        | 0.018 | 420(10)                       | 436(11)        | 0.023 |
| Previous MI                          | 815(13)                    | 855(14)        | 0.041 | 558(14)                       | 574(14)        | 0.018 |
| Previous PCI                         | 1239(20)                   | 1421(23)       | 0.107 | 883(22)                       | 886(22)        | 0.002 |
| Previous CABG                        | 728(12)                    | 745(12)        | 0.024 | 497(12)                       | 511(13)        | 0.018 |
| Diabetes mellitus                    | 1952(31)                   | 1924(31)       | 0.043 | 1298(32)                      | 1293(32)       | 0.003 |
| Hypertension                         | 4920(79)                   | 4815(78)       | 0.015 | 3223(79)                      | 3231(79)       | 0.006 |
| Dyslipidemia                         | 3383(54)                   | 3410(56)       | 0.029 | 2236(55)                      | 2247(55)       | 0.007 |
| Peripheral artery disease            | 992(16)                    | 816(13)        | 0.116 | 588(14)                       | 599(15)        | 0.012 |
| Coronary artery disease              | 2552(41)                   | 2530(41)       | 0.007 | 1668(41)                      | 1682(41)       | 0.009 |
| Atrial fibrillation                  | 1764(28)                   | 1590(26)       | 0.071 | 1087(27)                      | 1115(27)       | 0.019 |
| GFR<30 ml/min                        | 855(14)                    | 827(14)        | 0.011 | 565(14)                       | 574(14)        | 0.011 |
| Logistic euroSCORE(%)                | 15.2(10.0-23.1)            | 14.6(9.0-22.7) | 0.055 | 15.0(9.7-23.0)                | 15.0(9.3-23.3) | 0.018 |
| STS-PROM (%)                         | 6.4(4.0-13.9)              | 6.4(3.9-12.3)  | 0.082 | 6.3(4.0-14.4)                 | 6.6(4.0-12.8)  | 0.051 |
| Aortic mean gradient                 | 51.1±17.5                  | 51.0±17.2      | 0.006 | 51.0±17.6                     | 51.1±17.4      | 0.006 |
| <b>Implanted valves</b>              |                            |                |       |                               |                |       |
| Third generation                     | 1713(30)                   | 1670(29)       | 0.059 | 1122(30)                      | 1091(28)       | 0.042 |

A standardised mean difference of 0.1 or less indicated a negligible difference between the means of the two cohorts. \*in mmHg.

CVA= cerebrovascular event. TIA=transient ischemic attack. MI=myocardial infarction. PCI= percutaneous coronary intervention. CABG= coronary artery bypass graft.

GFR=Glomerular Filtration Ratio. STS-PROM=Society of Thoracic Surgeons Predicted Risk of Mortality. EuroSCORE= European System for Cardiac Operative Risk Evaluation.

**Supplementary Table S3. Baseline and procedural characteristics of patients that completed one year follow-up compared to those that did not complete one year follow-up in the propensity matched population**

|                                      | Completed one year<br>follow-up (n=5410) | Did not complete one-year<br>follow-up (n=2782) | <i>p-value</i> |
|--------------------------------------|------------------------------------------|-------------------------------------------------|----------------|
| <b>Demographics</b>                  |                                          |                                                 |                |
| Age (years)                          | 81.3±7.0                                 | 81.6±7.3                                        | 0.07           |
| Female gender                        | 3239(60)                                 | 1461(53)                                        | <0.001         |
| Body mass index (kg/m <sup>2</sup> ) | 27.1±4.9                                 | 27.2±4.6                                        | 0.28           |
| <b>Medical history</b>               |                                          |                                                 |                |
| Previous CVA or TIA                  | 569(11)                                  | 287(10)                                         | 0.78           |
| Previous MI                          | 740(14)                                  | 392(14)                                         | 0.61           |
| Previous PCI                         | 1179(22)                                 | 590(21)                                         | 0.54           |
| Previous CABG                        | 668(12)                                  | 340(12)                                         | 0.87           |
| Diabetes mellitus                    | 1736(32)                                 | 855(31)                                         | 0.21           |
| Hypertension                         | 4325(80)                                 | 2129(77)                                        | <0.001         |
| Dyslipidemia                         | 3046(56)                                 | 1437(52)                                        | <0.001         |
| Peripheral artery disease            | 795(15)                                  | 392(14)                                         | 0.46           |
| Coronary artery disease              | 2184(40)                                 | 166(42)                                         | 0.18           |
| Atrial fibrillation                  | 1467(27)                                 | 735(26)                                         | 0.50           |
| GFR<30 ml/min                        | 809(15)                                  | 330(12)                                         | <0.001         |
| Logistic euroSCORE(%)                | 14.6(9.2-23.0)                           | 15.7(10.0-23.3)                                 | 0.008          |
| STS-PROM (%)                         | 6.2(4.0-12.4)                            | 7.0(4.1-15.5)                                   | <0.001         |
| Aortic mean gradient                 | 50.0±16.9                                | 53.1±18.4                                       | <0.001         |
| Aortic max gradient                  | 79.6±23.8                                | 78.7±22.6                                       | 0.26           |
| Aortic valve area (cm <sup>2</sup> ) | 0.65±0.20                                | 0.67±0.19                                       | 0.002          |
| <b>Implanted valves</b>              |                                          |                                                 |                |
| Balloon-expandable                   | 2360(44)                                 | 1736(62)                                        | <0.001         |
| Third generation                     | 1405(26)                                 | 808(35)                                         | <0.001         |

CVA= cerebrovascular event. TIA=transient ischemic attack. MI=myocardial infarction. PCI= percutaneous coronary intervention. CABG= coronary artery bypass graft.

GFR=Glomerular Filtration Ratio. STS-PROM=Society of Thoracic Surgeons Predicted Risk of Mortality. EuroSCORE= European System for Cardiac Operative Risk Evaluation.
